# Supplementary material for: Do Interviewer Postsurvey Evaluations of Respondents’ Engagement Measure Who Respondents Are or What They Do? A Behavior Coding Study
Source: Oxford University Press journal article supplement (doi:10.1093/poq/nfx026), 2017-01-01
Supplement: nfx026_suppl_appendix.pdf [file nfx026_suppl_appendix.pdf]

## Appendix A

**Table A1. Interviewer Evaluations and Distributions Before Recoding**

| Measures        | Operationalization                                                                    | Percentage |
|-----------------|---------------------------------------------------------------------------------------|------------|
| Cooperativeness | Interviewer: Please rate the respondent's cooperation:                                |            |
|                 | 1 Very Good                                                                           | 63.28      |
|                 | 2 Good                                                                                | 29.10      |
|                 | 3 Fair                                                                                | 6.70       |
|                 | 4 Poor                                                                                | 0.92       |
|                 | 5 Very Poor                                                                           | 0.00       |
|                 | Recoded: 1 "Fair and below", 2 "Good", 3 "Very good"                                  |            |
| Interest        | Overall, how great was the respondent's interest in the interview?                    |            |
|                 | 1 Very High                                                                           | 25.17      |
|                 | 2 Above Average                                                                       | 33.49      |
|                 | 3 Average                                                                             | 39.03      |
|                 | 4 Below Average                                                                       | 2.31       |
|                 | 5 Very Low                                                                            | 0.00       |
|                 | Recoded: 1 "Average and below", 2 "Above average", 3 "Very high"                      |            |
| Friendliness    | In general, what was the respondent's attitude towards the interview?                 |            |
|                 | 1 Friendly and eager                                                                  | 59.82      |
|                 | 2 Cooperative but not particularly eager                                              | 38.34      |
|                 | 3 Indifferent and bored                                                               | 1.62       |
|                 | 4 Hostile                                                                             | 0.23       |
|                 | Recoded: 0 "Cooperative but not particularly eager and below", 1 "Friendly and eager" |            |
| Talkativeness   | How talkative was the respondent during the interview?                                |            |
|                 | 1 Very untalkative                                                                    | 3.00       |
|                 | 2 Somewhat untalkative                                                                | 12.01      |
|                 | 3 Neither talkative nor untalkative                                                   | 45.27      |
|                 | 4 Somewhat talkative                                                                  | 30.95      |
|                 | 5 Very talkative                                                                      | 8.78       |

## Appendix B

**Table B1. Multilevel Ordered Logistic Regression (Cooperativeness, Interest)**

|                                   | Cooperativeness |         |                    | Interest |         |                    |
|-----------------------------------|-----------------|---------|--------------------|----------|---------|--------------------|
|                                   | Model 1         | Model 2 | Model 3            | Model 1  | Model 2 | Model 3            |
| Respondent answering behaviors    |                 |         |                    |          |         |                    |
| Adequate answer with elaboration  |                 |         | -0.04<br>(0.05)    |          |         | 0.05<br>(0.04)     |
| Adequate answer w/o elaboration   |                 |         | -0.03<br>(0.03)    |          |         | -0.01<br>(0.02)    |
| Qualified answer with elaboration |                 |         | -0.12<br>(0.10)    |          |         | 0.07<br>(0.09)     |
| Qualified answer w/o elaboration  |                 |         | -0.03<br>(0.05)    |          |         | -0.04<br>(0.04)    |
| Uncodable answer with elaboration |                 |         | -0.05<br>(0.04)    |          |         | 0.01<br>(0.03)     |
| Uncodable answer w/o elaboration  |                 |         | -0.09*<br>(0.04)   |          |         | -0.08*<br>(0.04)   |
| Don't know                        |                 |         | -0.17<br>(0.10)    |          |         | -0.33***<br>(0.09) |
| Refusal                           |                 |         | -0.37***<br>(0.10) |          |         | -0.26***<br>(0.09) |
| 'Other' answer                    |                 |         | 0.24<br>(0.27)     |          |         | 0.07<br>(0.24)     |
| Nonverbal utterances              |                 |         |                    |          |         |                    |
| Laughter                          |                 |         | 0.06<br>(0.03)     |          |         | 0.08**<br>(0.02)   |
| Disfluency                        |                 |         | 0.04**<br>(0.02)   |          |         | 0.03**<br>(0.01)   |
| Personal involvement and rapport  |                 |         |                    |          |         |                    |
| Agrees with interviewer           |                 |         | -0.08<br>(0.08)    |          |         | -0.03<br>(0.07)    |
| Affirmative feedback              |                 |         | 0.14***<br>(0.04)  |          |         | -0.03<br>(0.03)    |

|                             |                 |                  |                   |                   |
|-----------------------------|-----------------|------------------|-------------------|-------------------|
| Acknowledging feedback      |                 | 0.04<br>(0.05)   |                   | 0.04<br>(0.03)    |
| Task-related feedback       |                 | -0.04<br>(0.22)  |                   | -0.03<br>(0.19)   |
| Digression                  |                 | 0.11<br>(0.06)   |                   | 0.03<br>(0.05)    |
| Personal disclosure         |                 | -0.02<br>(0.03)  |                   | -0.03<br>(0.03)   |
| 'Other' feedback            |                 | 0.06<br>(0.11)   |                   | -0.02<br>(0.09)   |
| Clarification behaviors     |                 |                  |                   |                   |
| Interrupts Interviewer      |                 | -0.04<br>(0.02)  |                   | 0.01<br>(0.02)    |
| Clarification - repeat      |                 | -0.02<br>(0.07)  |                   | 0.02<br>(0.06)    |
| Clarification - definition  |                 | -0.03<br>(0.15)  |                   | -0.08<br>(0.12)   |
| Clarification - what        |                 | -0.17*<br>(0.07) |                   | -0.21**<br>(0.07) |
| Clarification - unit        |                 | -0.13<br>(0.12)  |                   | -0.04<br>(0.11)   |
| Respondent characteristics  |                 |                  |                   |                   |
| Age (cent.)                 | -0.01<br>(0.01) | 0.00<br>(0.01)   | -0.00<br>(0.01)   | -0.00<br>(0.01)   |
| Female (ref. Male)          | -0.00<br>(0.24) | -0.07<br>(0.27)  | -0.12<br>(0.21)   | -0.23<br>(0.23)   |
| Nonwhite (ref. White)       | -0.20<br>(0.35) | 0.03<br>(0.40)   | 0.13<br>(0.31)    | 0.25<br>(0.34)    |
| High school or less         | -0.35<br>(0.28) | -0.39<br>(0.32)  | -0.67**<br>(0.25) | -0.63*<br>(0.27)  |
| Income                      | 0.00<br>(0.07)  | -0.04<br>(0.08)  | -0.01<br>(0.06)   | -0.07<br>(0.07)   |
| Interviewer characteristics |                 |                  |                   |                   |
| Female (ref. Male)          | 0.50<br>(0.77)  | 0.35<br>(0.86)   | -0.82<br>(0.77)   | -1.08<br>(0.86)   |

|                                   |                    |                    |                    |                   |                  |                  |
|-----------------------------------|--------------------|--------------------|--------------------|-------------------|------------------|------------------|
| Nonwhite (ref. White)             |                    | -0.51<br>(0.68)    | -0.47<br>(0.76)    |                   | -0.25<br>(0.68)  | -0.09<br>(0.76)  |
| Interviewer experience 1+ year(s) |                    | -1.08<br>(0.85)    | -1.18<br>(0.94)    |                   | -1.03<br>(0.85)  | -1.02<br>(0.94)  |
| Cooperation rate                  |                    | 0.12<br>(0.79)     | -0.04<br>(0.88)    |                   | 0.51<br>(0.80)   | 0.48<br>(0.89)   |
| Respondent control variables      |                    |                    |                    |                   |                  |                  |
| Married (ref. Unmarried)          |                    | 0.17<br>(0.25)     | 0.19<br>(0.29)     |                   | -0.16<br>(0.22)  | -0.10<br>(0.25)  |
| Computer user                     |                    | 1.12***<br>(0.31)  | 0.88*<br>(0.36)    |                   | 0.80**<br>(0.30) | 0.68*<br>(0.33)  |
| # of Questions asked (cent.)      |                    | 0.00<br>(0.04)     | 0.02<br>(0.05)     |                   | 0.03<br>(0.03)   | 0.04<br>(0.04)   |
| Intercept 1                       | -3.30***<br>(0.38) | -3.50***<br>(1.04) | -4.77***<br>(1.18) | -0.48<br>(0.32)   | -1.35<br>(1.01)  | -1.81<br>(1.11)  |
| Intercept 2                       | -0.77*<br>(0.33)   | -0.76<br>(1.02)    | -1.50<br>(1.14)    | 1.47***<br>(0.33) | 0.72<br>(1.00)   | 0.55<br>(1.11)   |
| Interviewer level variance        | 1.72*<br>(0.69)    | 1.65*<br>(0.67)    | 2.03*<br>(0.84)    | 1.72**<br>(0.65)  | 1.75**<br>(0.66) | 2.16**<br>(0.82) |
| Model Fit:                        |                    |                    |                    |                   |                  |                  |
| AIC                               | 640.09             | 625.24             | 595.57             | 821.64            | 811.22           | 790.28           |
| Observations                      | 433                | 433                | 433                | 433               | 433              | 433              |

Note: All behaviors are respondent behaviors. Standard errors in parentheses; \* p<0.05, \*\* p<0.01, \*\*\* p<0.001

**Table B2. Multilevel Ordered Logistic Regression (Friendliness, Talkativeness)**

|                                   | Friendliness |         |                    | Talkativeness |         |                   |
|-----------------------------------|--------------|---------|--------------------|---------------|---------|-------------------|
|                                   | Model 1      | Model 2 | Model 3            | Model 1       | Model 2 | Model 3           |
| Respondent answering behaviors    |              |         |                    |               |         |                   |
| Adequate answer with elaboration  |              |         | 0.02<br>(0.06)     |               |         | 0.17***<br>(0.04) |
| Adequate answer w/o elaboration   |              |         | 0.00<br>(0.03)     |               |         | 0.04<br>(0.02)    |
| Qualified answer with elaboration |              |         | 0.40**<br>(0.13)   |               |         | 0.10<br>(0.08)    |
| Qualified answer w/o elaboration  |              |         | 0.03<br>(0.05)     |               |         | 0.02<br>(0.04)    |
| Uncodable answer with elaboration |              |         | -0.07<br>(0.04)    |               |         | 0.08*<br>(0.03)   |
| Uncodable answer w/o elaboration  |              |         | -0.03<br>(0.04)    |               |         | -0.03<br>(0.03)   |
| Don't know                        |              |         | -0.38***<br>(0.11) |               |         | -0.17*<br>(0.08)  |
| Refusal                           |              |         | -0.30**<br>(0.11)  |               |         | -0.07<br>(0.08)   |
| 'Other' answer                    |              |         | 0.00<br>(0.27)     |               |         | -0.03<br>(0.21)   |
| Nonverbal utterances              |              |         |                    |               |         |                   |
| Laughter                          |              |         | 0.14***<br>(0.04)  |               |         | -0.03<br>(0.02)   |
| Disfluency                        |              |         | 0.02<br>(0.02)     |               |         | 0.02<br>(0.01)    |
| Personal involvement and rapport  |              |         |                    |               |         |                   |
| Agrees with interviewer           |              |         | 0.08<br>(0.10)     |               |         | -0.03<br>(0.07)   |
| Affirmative feedback              |              |         | 0.05<br>(0.04)     |               |         | -0.05<br>(0.03)   |
| Acknowledging feedback            |              |         | 0.09<br>(0.05)     |               |         | 0.04<br>(0.03)    |

|                             |        |        |        |         |
|-----------------------------|--------|--------|--------|---------|
| Task-related feedback       |        | -0.27  |        | -0.07   |
|                             |        | (0.24) |        | (0.17)  |
| Digression                  |        | 0.08   |        | 0.07    |
|                             |        | (0.07) |        | (0.05)  |
| Personal disclosure         |        | -0.05  |        | 0.08**  |
|                             |        | (0.04) |        | (0.03)  |
| 'Other' feedback            |        | 0.02   |        | -0.06   |
|                             |        | (0.11) |        | (0.08)  |
| Clarification behaviors     |        |        |        |         |
| Interrupts Interviewer      |        | -0.00  |        | 0.01    |
|                             |        | (0.02) |        | (0.02)  |
| Clarification - repeat      |        | 0.08   |        | -0.00   |
|                             |        | (0.08) |        | (0.06)  |
| Clarification - definition  |        | 0.04   |        | 0.08    |
|                             |        | (0.18) |        | (0.13)  |
| Clarification - what        |        | -0.14  |        | -0.02   |
|                             |        | (0.08) |        | (0.06)  |
| Clarification - unit        |        | -0.18  |        | 0.02    |
|                             |        | (0.13) |        | (0.10)  |
| Respondent characteristics  |        |        |        |         |
| Age (cent.)                 | 0.00   | 0.00   | 0.02** | 0.00    |
|                             | (0.01) | (0.01) | (0.01) | (0.01)  |
| Female (ref. Male)          | 0.12   | 0.09   | 0.47*  | 0.76*** |
|                             | (0.24) | (0.29) | (0.20) | (0.23)  |
| Nonwhite (ref. White)       | 0.21   | -0.15  | -0.02  | -0.53   |
|                             | (0.36) | (0.43) | (0.30) | (0.34)  |
| High school or less         | -0.48  | -0.58  | 0.56*  | 0.67**  |
|                             | (0.28) | (0.34) | (0.23) | (0.26)  |
| Income                      | 0.01   | -0.04  | 0.01   | 0.01    |
|                             | (0.07) | (0.08) | (0.06) | (0.06)  |
| Interviewer characteristics |        |        |        |         |
| Female (ref. Male)          | 0.47   | 0.19   | 0.62   | 0.59    |
|                             | (0.67) | (0.82) | (0.70) | (0.84)  |
| Nonwhite (ref. White)       | -0.01  | 0.23   | -0.89  | -0.74   |
|                             | (0.60) | (0.73) | (0.62) | (0.75)  |

|                                   |                 |                 |                 |                    |                    |                    |
|-----------------------------------|-----------------|-----------------|-----------------|--------------------|--------------------|--------------------|
| Interviewer experience 1+ year(s) |                 | 0.39<br>(0.75)  | 0.85<br>(0.92)  |                    | -0.41<br>(0.77)    | -0.25<br>(0.93)    |
| Cooperation rate                  |                 | -0.21<br>(0.70) | -0.65<br>(0.86) |                    | -0.36<br>(0.72)    | -0.62<br>(0.87)    |
| Respondent control variables      |                 |                 |                 |                    |                    |                    |
| Married (ref. Unmarried)          |                 | -0.19<br>(0.25) | -0.24<br>(0.30) |                    | -0.35<br>(0.21)    | -0.37<br>(0.23)    |
| Computer user                     |                 | 0.39<br>(0.33)  | 0.12<br>(0.39)  |                    | 0.05<br>(0.27)     | 0.03<br>(0.30)     |
| # of Questions asked (cent.)      |                 | 0.06<br>(0.04)  | 0.05<br>(0.06)  |                    | 0.09**<br>(0.03)   | 0.04<br>(0.04)     |
| Intercept 1                       | -0.47<br>(0.28) | 0.14<br>(0.93)  | 0.41<br>(1.13)  | -4.39***<br>(0.45) | -4.79***<br>(0.97) | -5.24***<br>(1.15) |
| Intercept 2                       |                 |                 |                 | -2.28***<br>(0.35) | -2.61**<br>(0.92)  | -2.99***<br>(1.10) |
| Intercept 3                       |                 |                 |                 | 0.54<br>(0.33)     | 0.32<br>(0.91)     | 0.45<br>(1.09)     |
| Intercept 4                       |                 |                 |                 | 2.93***<br>(0.37)  | 2.77**<br>(0.93)   | 3.66**<br>(1.12)   |
| Interviewer level variance        | 1.24*<br>(0.51) | 1.26*<br>(0.52) | 1.89*<br>(0.80) | 1.76**<br>(0.65)   | 1.43**<br>(0.54)   | 2.15**<br>(0.80)   |
| Model Fit:                        |                 |                 |                 |                    |                    |                    |
| AIC                               | 522.51          | 529.29          | 492.03          | 1013.78            | 1011.11            | 937.98             |
| Observations                      | 433             | 433             | 433             | 433                | 433                | 433                |

Note: All behaviors are respondent behaviors. Standard errors in parentheses; \* p<0.05, \*\* p<0.01, \*\*\* p<0.001

## Appendix C

**Table C1. Adjusted Predictions for Significant Systematic Processing Indicators (Cooperativeness, Interest)**

|                                  | Cooperativeness   |         |         |               |        |        |           |         |         |
|----------------------------------|-------------------|---------|---------|---------------|--------|--------|-----------|---------|---------|
|                                  | Fair and Below    |         |         | Good          |        |        | Very Good |         |         |
|                                  | -1 SD             | Mean    | +1 SD   | -1 SD         | Mean   | +1 SD  | -1 SD     | Mean    | +1 SD   |
| Respondent answering behaviors   |                   |         |         |               |        |        |           |         |         |
| Uncodable answer w/o elaboration | 0.05              | 0.06*   | 0.08    | 0.26          | 0.30*  | 0.34*  | 0.69      | 0.64*   | 0.58*   |
| Refusal                          | 0.05              | 0.06**  | 0.09**  | 0.28          | 0.30** | 0.35** | 0.67      | 0.64*** | 0.56*** |
| Nonverbal utterances             |                   |         |         |               |        |        |           |         |         |
| Disfluency                       | 0.09              | 0.06*   | 0.04**  | 0.35          | 0.30** | 0.24** | 0.56      | 0.64**  | 0.72**  |
| Personal involvement and rapport |                   |         |         |               |        |        |           |         |         |
| Affirmative feedback             | 0.10              | 0.06*   | 0.04**  | 0.37          | 0.29** | 0.22** | 0.53      | 0.64**  | 0.74*** |
| Clarification behaviors          |                   |         |         |               |        |        |           |         |         |
| Clarification - what             | 0.05              | 0.06*   | 0.08*   | 0.27          | 0.30*  | 0.33*  | 0.68      | 0.64*   | 0.59*   |
|                                  | Interest          |         |         |               |        |        |           |         |         |
|                                  | Average and below |         |         | Above Average |        |        | Very High |         |         |
|                                  | -1 SD             | Mean    | +1 SD   | -1 SD         | Mean   | +1 SD  | -1 SD     | Mean    | +1 SD   |
| Respondent answering behaviors   |                   |         |         |               |        |        |           |         |         |
| Uncodable answer w/o elaboration | 0.36              | 0.41*   | 0.47*   | 0.35          | 0.34   | 0.33   | 0.29      | 0.24*   | 0.20*   |
| Don't know                       | 0.37              | 0.41*** | 0.47*** | 0.35          | 0.35   | 0.33   | 0.28      | 0.24**  | 0.20*** |
| Refusal                          | 0.39              | 0.41**  | 0.46**  | 0.35          | 0.34   | 0.33   | 0.26      | 0.25**  | 0.21**  |
| Nonverbal utterances             |                   |         |         |               |        |        |           |         |         |
| Laughter                         | 0.47              | 0.41**  | 0.34*** | 0.33          | 0.35   | 0.35   | 0.20      | 0.24**  | 0.30**  |
| Disfluency                       | 0.48              | 0.41**  | 0.34**  | 0.33          | 0.35   | 0.36   | 0.19      | 0.24**  | 0.30*   |
| Clarification behaviors          |                   |         |         |               |        |        |           |         |         |
| Clarification - what             | 0.35              | 0.41**  | 0.48**  | 0.35          | 0.34   | 0.33   | 0.30      | 0.24**  | 0.20**  |

Note: Model 3. All behaviors are respondent behaviors. Models also include all indicators of heuristic processing and controls. \* p<0.05, \*\* p<0.01, \*\*\* p<0.001 indicate differences between -1 SD and mean (Mean) and +1SD and mean (+1 SD).



**Table C2. Adjusted Predictions for Significant Systematic Processing Indicators (Friendliness, Talkativeness)**

|                                   | Friendliness                           |         |         |                      |         |         |             |       |       |                    |        |        |                |        |        |
|-----------------------------------|----------------------------------------|---------|---------|----------------------|---------|---------|-------------|-------|-------|--------------------|--------|--------|----------------|--------|--------|
|                                   | Cooperative but not particularly eager |         |         | Friendly and eager   |         |         |             |       |       |                    |        |        |                |        |        |
|                                   | -1 SD                                  | Mean    | +1 SD   | -1 SD                | Mean    | +1 SD   |             |       |       |                    |        |        |                |        |        |
| Respondent answering behaviors    |                                        |         |         |                      |         |         |             |       |       |                    |        |        |                |        |        |
| Qualified answer with elaboration | 0.46                                   | 0.40**  | 0.31**  | 0.54                 | 0.60**  | 0.69**  |             |       |       |                    |        |        |                |        |        |
| Don't know                        | 0.35                                   | 0.41*** | 0.48*** | 0.65                 | 0.59*** | 0.52*** |             |       |       |                    |        |        |                |        |        |
| Refusal                           | 0.38                                   | 0.41**  | 0.47**  | 0.62                 | 0.59**  | 0.53**  |             |       |       |                    |        |        |                |        |        |
| Nonverbal utterances              |                                        |         |         |                      |         |         |             |       |       |                    |        |        |                |        |        |
| Laughter                          | 0.51                                   | 0.40*** | 0.29*** | 0.49                 | 0.60*** | 0.71*** |             |       |       |                    |        |        |                |        |        |
|                                   | Talkativeness                          |         |         |                      |         |         |             |       |       |                    |        |        |                |        |        |
|                                   | Very untalkative                       |         |         | Somewhat untalkative |         |         | Neither Nor |       |       | Somewhat talkative |        |        | Very talkative |        |        |
|                                   | -1 SD                                  | Mean    | +1 SD   | -1 SD                | Mean    | +1 SD   | -1 SD       | Mean  | +1 SD | -1 SD              | Mean   | +1 SD  | -1 SD          | Mean   | +1 SD  |
| Respondent answering behaviors    |                                        |         |         |                      |         |         |             |       |       |                    |        |        |                |        |        |
| Adequate answer with elaboration  | 0.04                                   | 0.02*   | 0.01*   | 0.14                 | 0.10**  | 0.07*** | 0.49        | 0.46* | 0.41* | 0.28               | 0.34** | 0.39** | 0.05           | 0.08** | 0.11** |
| Uncodable answer with elaboration | 0.03                                   | 0.03    | 0.02    | 0.13                 | 0.11*   | 0.08*   | 0.47        | 0.45  | 0.42  | 0.29               | 0.33*  | 0.37*  | 0.07           | 0.08*  | 0.11*  |
| Don't know                        | 0.02                                   | 0.03    | 0.03    | 0.10                 | 0.11*   | 0.13    | 0.44        | 0.45  | 0.46  | 0.34               | 0.32*  | 0.30*  | 0.10           | 0.09   | 0.08*  |
| Personal involvement and rapport  |                                        |         |         |                      |         |         |             |       |       |                    |        |        |                |        |        |
| Personal disclosure               | 0.03                                   | 0.02    | 0.02*   | 0.12                 | 0.10*   | 0.08**  | 0.47        | 0.46* | 0.41* | 0.31               | 0.34*  | 0.39*  | 0.06           | 0.08** | 0.11*  |

Note: Model 3. All behaviors are respondent behaviors. Models also include all indicators of heuristic processing and controls. \* p<0.05, \*\* p<0.01, \*\*\* p<0.001 indicate differences between -1 SD and mean (Mean) and +1 SD and mean (+1 SD).

## Appendix D

Investigating validity and reliability is not straightforward for ordinal measures. In order to assess validity and reliability, we use a two-level hierarchical linear model that allows us to separate interviewer- from respondent-level variances of our measures at each stage for each dependent variable (see Model 1, Model 2, and Model 3 in the paper). Despite violating central modeling assumptions contrary to the multilevel ordered logit analysis presented in the paper, this allows us to have an estimate of the residual error variance (variance due to respondents), variance that is constrained in the categorical models.

Table D.1 displays Cohen's  $f^2$ , a measure capturing the proportion of variance uniquely attributable to indicators of either heuristic or systematic processing while controlling for the other group of indicators (Selya et al. 2012). Effect sizes are considered moderate when  $f^2 \geq 0.15$  and large when  $f^2 \geq 0.35$  (Cohen 1988).

Cohen's  $f^2$  at the interviewer level ranges from 0.06 to 0.19 for the heuristic indicators and from -0.10 to 0.15 for the systematic indicators. Cooperativeness, interest, and friendliness ratings follow similar patterns, whereas talkativeness differs at the interviewer level. The proportion of variance uniquely attributable to heuristic processing at the respondent level is small and ranges between 0.01 and 0.06 whereas the proportion of variance explained by indicators of systematic processing is substantially larger and ranges from 0.14 to 0.31. The comparatively smaller effect of heuristic processing at the respondent level compared to the interviewer level is plausible given that the heuristic processing model contains both respondent and interviewer characteristics.

**Table D.1. Cohen's  $f^2$  at the interviewer and respondent level**

|                                    | <b>Cooperativeness</b> |       | <b>Interest</b> |       | <b>Friendliness</b> |       | <b>Talkativeness</b> |        |
|------------------------------------|------------------------|-------|-----------------|-------|---------------------|-------|----------------------|--------|
|                                    | Heur.                  | Syst. | Heur.           | Syst. | Heur.               | Syst. | Heur.                | Syst.  |
| Interviewer-level<br>Cohen's $f^2$ | 0.193                  | 0.152 | 0.127           | 0.115 | 0.057               | 0.103 | 0.191                | -0.105 |
| Respondent-level<br>Cohen's $f^2$  | 0.033                  | 0.192 | 0.036           | 0.141 | 0.015               | 0.193 | 0.061                | 0.307  |
| N                                  | 433                    | 433   | 433             | 433   | 433                 | 433   | 433                  | 433    |

Overall, our results suggest that the remaining residual variance components are still considerable (although this is typical with social science research; Cohen et al. 2003, p. 92) and that interviewer assessments of respondent engagement vary by interviewer. Nonetheless, decomposing the explained variance in the multilevel models supports our findings that a large share of the explained variance is uniquely due to our indicators of systematic processing and to a lesser extent to heuristic processing. First, analyses not presented here show that the interviewer variance components in these models are generally smaller than the respondent-level variance components. Systematic processing uniquely explains a moderate to (approaching) large share of the variance at the respondent level (which is the primary level of interest) compared to both the interviewer level and the indicators of heuristic processing. The uniquely explained variance at the interviewer level for both heuristic processing indicators and systematic processing indicators is similar in magnitude, generally falling in the small to moderate range.

Overall, these results suggest that our measures of systematic processing are valid – they reflect actual behaviors more than heuristic decisions – and the variability across respondents is greater than the variability across interviewers. The size of the effects indicate that the evaluations are moderately reliable measures of the behaviors, but that further research can be done to explain the unexplained variance at both the interviewer and respondent level.

**References:**

Cohen, Jacob. 1988. *Statistical Power Analysis for the Behavioral Sciences*. Hillsdale, NJ:

Lawrence Erlbaum Associates, Inc.

Cohen, Jacob, Patricia Cohen, Stephen G. West, and Leona S. Aiken. 2003. *Applied Multiple*

*Regression/Correlation Analysis for the Behavioral Sciences*. Mahawah, NJ: Lawrence

Erlbaum Associates, Inc.

Selya, Arielle S., Jennifer S. Rose, Lisa C. Dierker, Donald Hedeker, and Robin J. Mermelstein.

2012. A Practical Guide to Calculating Cohen's  $f^2$ , a Measure of Local Effect Size, from

PROC MIXED. *Frontiers in Psychology*, 3: 111.
